# Supplementary material
Source: publisher site journal article supplement (https://www.spandidos-publications.com/1861/downloadSupplementary)

Figure S1. Transfection efficiency of OE-TJP3 in ES-2 and A2780 cells were detected using western blotting. All data are representative of  $\geq 3$  independent experiments. Data are presented as the mean  $\pm$  SD. \*\* $P < 0.01$  vs. control group; \*\*\* $P < 0.001$  vs. control group as determined by Student's t-tests. TJP3, tight junction protein 3; OE, overexpressed; NC, negative control.

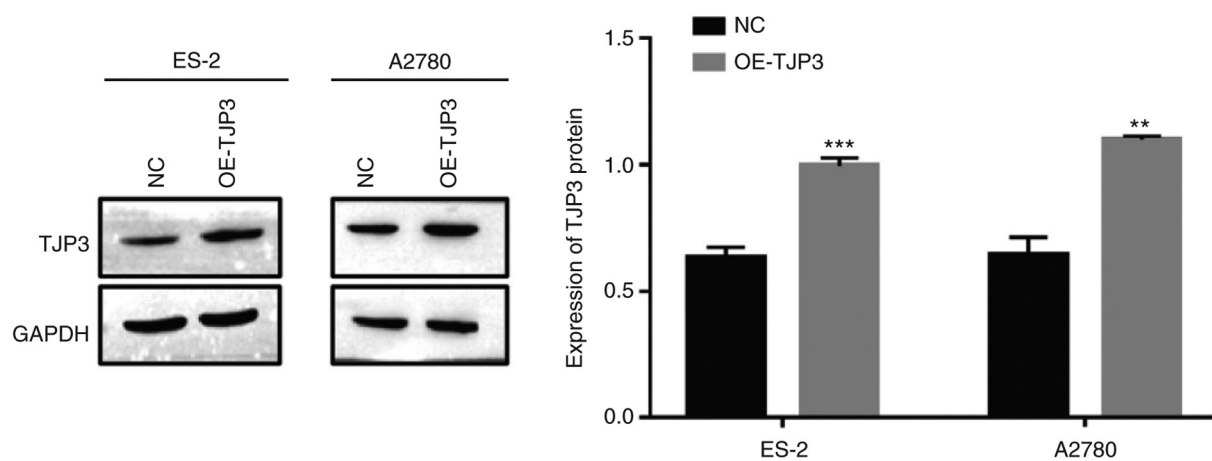

Supplement: Supplementary file 1 [file downloadSupplementary]
